## **More than privacy: Australians' concerns and misconceptions about the COVIDSafe App: a short report**

**Authors:** Rae Thomas, Zoe Michaleff, Hannah Greenwood, Eman Abukmail, Paul Glasziou

**Affiliation:** Institute for Evidence-Based Healthcare, Bond University, Australia.

**Corresponding Author:** Associate Professor Rae Thomas email; [rthomas@bond.edu.au](mailto:rthomas@bond.edu.au)

### **Abstract**

This survey of 1500 Australians about the COVIDSafe app found that the reasons for not downloading included privacy concerns, phone capabilities, and beliefs of limited benefit. COVIDSafe knowledge varied with confusion about purpose and capabilities. Public health messaging will need to address these perceptions to achieve sufficient uptake.

### **Introduction**

Since the Australian Government launched the COVIDSafe app to “help support and protect you, your friends and family” [1] over 5.4 million Australians (21%) have downloaded the app, but still short of the 40% target. While this action has been supported by many organisations, [2] it remains controversial with unanswered questions [3]. We aimed to explore: a) reasons for choosing not to download the app and b) Australians' understanding about the app's purpose and capabilities.

### **Method**

Participants were recruited for a national, cross-sectional, online survey by a market research company (Dynata) with quotas for nationally representative proportions of age and gender. Participants were included if  $\geq 18$  years, and excluded if they had, or thought they had, COVID-19 or were healthcare professionals.

All participants were asked whether they had, or intended to download the COVIDSafe app. If they responded “unsure” or “no intention to download”, they were asked to provide a reason for their response. We qualitatively coded the reasons for inaction and uncertainty.

NOTE: This preprint reports new research that has not been certified by peer review and should not be used to guide clinical practice.

Additionally, all participants rated their strength of agreement (strongly disagree - strongly agree and a don't know response) on six statements related to the app's purpose.

## Results

Of the 1802 potential participants contacted, 289 were excluded, 13 declined and 1500 participated in the survey (response rate 83%). Gender (50% male) and education levels distributed evenly ( $\leq$ highschool and TAFE qualification 49%; tertiary qualification 51%) .

Of survey participants, 37% (560/1500) said they had downloaded the COVIDSafe app, 19% intend to download, 28% refused to download, and 16% remain undecided. Of those who refused or remain undecided (n=640), 25% cited privacy concerns as their primary reason. Importantly, almost another quarter (24%) cited technical problems such as: their phone was too old or had data consumption and storage space limitations. Other reasons included a belief that social distancing was sufficient and the app is unnecessary for them (16%), distrust in the Government (11%), questioning the app's effectiveness (7%), wanting to explore further information before deciding (5%), and miscellaneous responses (11%) including apathy and following the decisions of others.

Most participants correctly agreed that the app would make contact tracing faster and easier (75%), that more potentially exposed people would be found and informed (73%), and correctly disagreed that it would detect whether an individual would have COVID-19 (60%). In contrast, 50% of participants thought their personal information would be shared post-pandemic and incorrectly thought the app would detect when people with COVID-19 were near them (76%). Interestingly, participants were almost divided in their opinions as to whether the app would inform them it was safe to leave their house (see Figure).

## Discussion

Contributing almost half of the inaction in downloading COVIDSafe were concerns about privacy or technical limitations of their phone. Many participants had marked misconceptions about the purpose and capability of the COVIDsafe app. Concerns raised in this survey are

mirrored in a smaller, unpublished Australian survey (n=536) [4]. Addressing these perceptions and issues in public messaging will be important to achieving sufficient uptake.

**Competing interests:** no relevant disclosures

**Acknowledgements:** RT, ZM, and HG are supported by a National Health and Medical Research Council Program grant (#1106452). PG is supported by a NHMRC Research Fellowship (#1080042).

## References

1. Australian Government, Department of Health. COVIDSafe app [internet, cited 2020 May 13]. Available from: <https://www.health.gov.au/resources/apps-and-tools/covidsafe-app>
2. Christodoulou D, Samuell D, Slonim R, compilers. Endorse COVIDSafe [internet, cited 2020 May 13]. Available from: <https://endorsecovidsafe.com/>
3. Leins K, Culnane C, Rubinstein BIP. Tracking, tracing, trust: Contemplating mitigating the impact of COVID-19 through technological interventions. *Med J Aust* 2020; <https://www.mja.com.au/journal/2020/tracking-tracing-trust-contemplating-mitigating-impact-covid-19-through-technological> [Preprint, 7 May 2020].
4. Garret P, White J, Little D, et al. A representative sample of Australian participant's attitudes towards the COVIDSafe App. [internet, cited 2020 May 13<sup>th</sup>]. Available from: <https://paulgarrettphd.github.io/Site/Wave3PrelimAnalysis.html>

Figure. Participants' ratings of suggested purposes and capabilities of the COVIDSafe app (N=1500) .

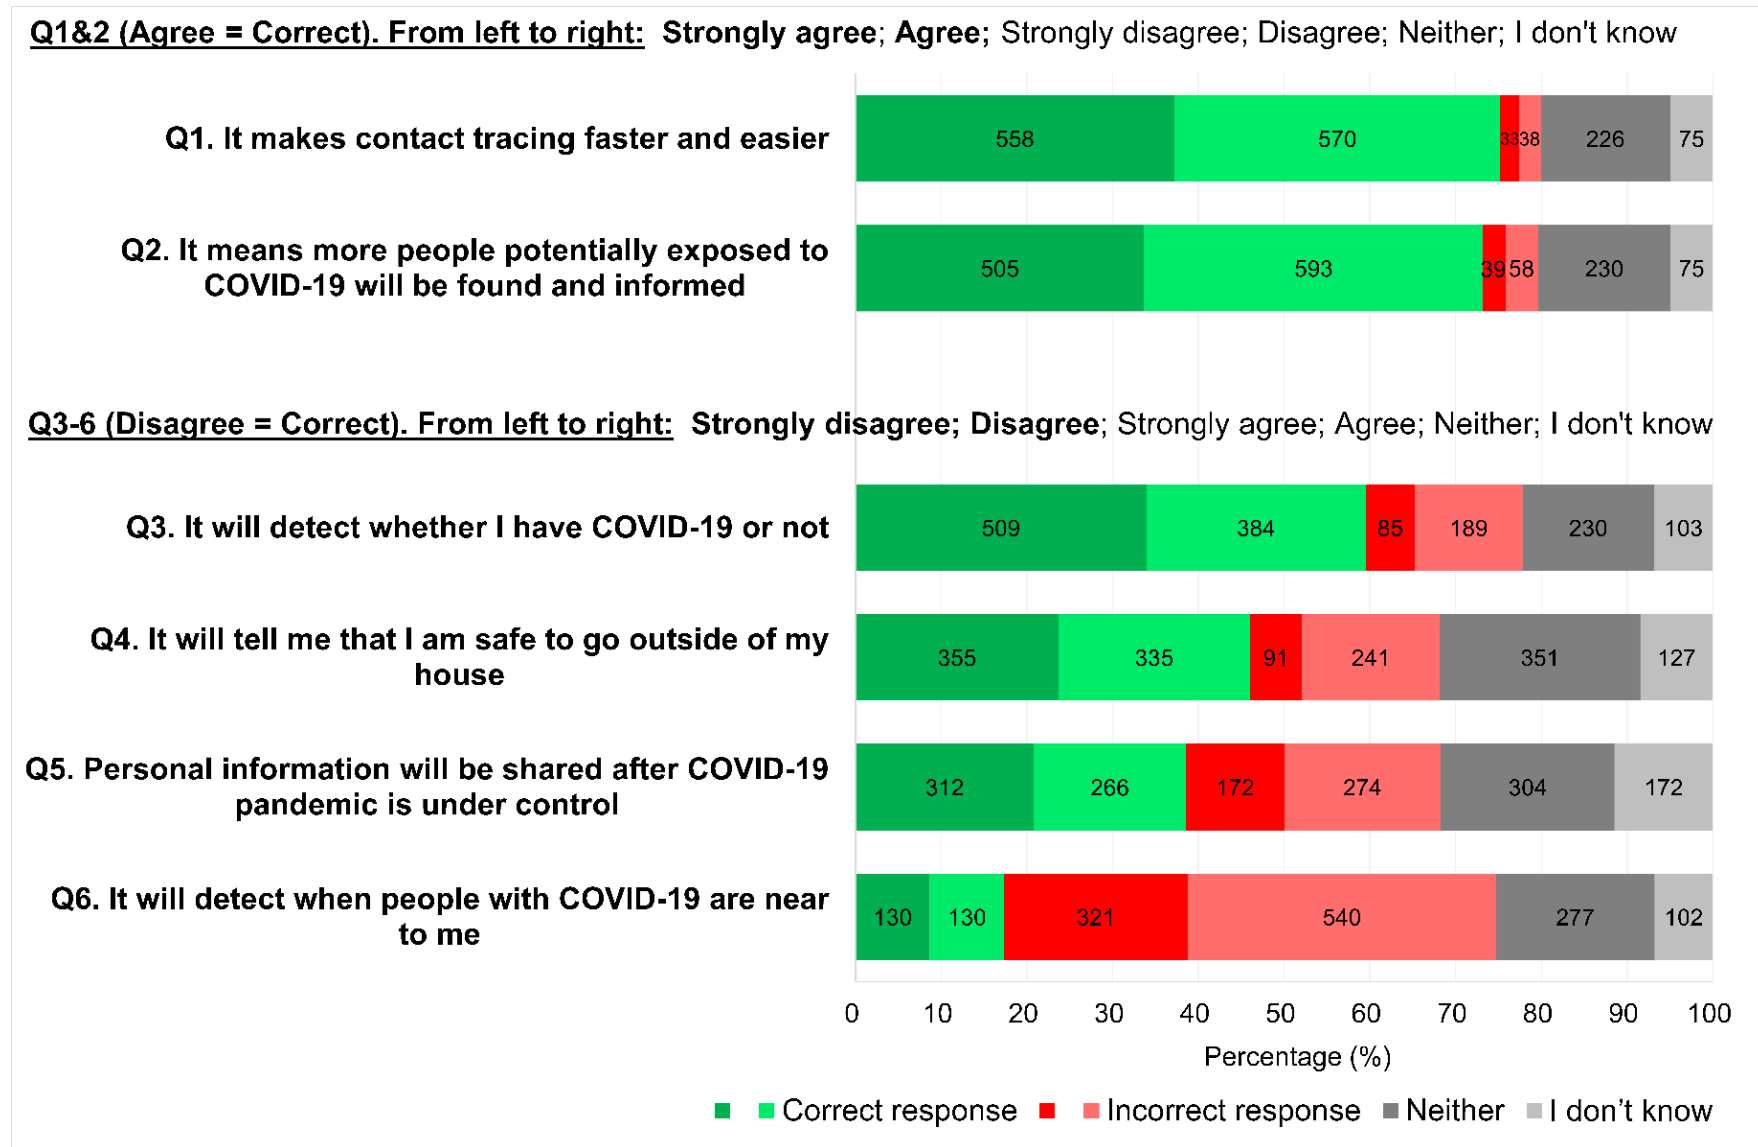

Source: https://medrxiv.org/content/medrxiv/early/2020/06/09/2020.06.09.20126110.full.pdf
